# Supplementary material
Source: Springer Nature journal article supplement (https://www.springermedizin.de/resource/supplementary/12943_2013_1160_MOESM1_ESM.pdf/9552616)
Supplement: MOESM1 [file 9552616]

Unconserved 1 2 3 4 5 6 7 8 9 10 Conserved

|                   | 10         | 20         | 30         | 40         | 50          |
|-------------------|------------|------------|------------|------------|-------------|
| Homo sapiens      | ---MVYKT   | LFALCILTAG | WRVQSLPTSA | PLSVSLPTNI | VPPTTIWTSS  |
| Pan troglodytes   | ---MVYKT   | LFALCILTAG | WRVQSLPTSA | PLSVSLPTNI | MPPTTIWTSS  |
| Mus musculus      | ---MVCKV   | LIALCIFTAG | LRVQGSPT-V | PLPVSLMTKS | SAPVATWTTS  |
| Pongo abelii      | ---MVYKT   | LFALCILTAG | WRVQSLPTSA | PLSVSLPTNI | MPPTTIWTSS  |
| Sus scrofa        | ---MVCKT   | LFALFIVTAG | LRVQRVSAST | VLPVFLPTKI | TPATAVWTSP  |
| Bos taurus        | ---MVCKT   | LFALCIFTAG | LRLQSVSASI | PSTDLSLAET | TTPTAIWTSS  |
| Rattus norvegicus | ---MVCKA   | LITLCIFAAG | LMVQGSPTPT | LLPVSLTTKS | TAPMATWTTS  |
| Gallus gallus     | MHPDLAVRPA | ALVPCRYQK  | LSDSSWPAAL | PALQDSYEFA | PDFQADHGGGA |
| Consistency       | 000008*    | 486        | 8677775688 | 5668647755 | 6646683745  |

|                   | 60         | 70         | 80         | 90         | 100        |
|-------------------|------------|------------|------------|------------|------------|
| Homo sapiens      | PQNTDADTAS | PSNGTHNNSV | LPVTASAPTS | LLPKNISI-- | -ESREEEITS |
| Pan troglodytes   | PQNTDADTAS | PSNGTHNNSV | LPVTASAPTS | LLLKNISV-- | -ESREEEITS |
| Mus musculus      | APHTARATTP | VASATHNASV | LRTTAASLTS | ---QLPT--  | -DHREEAVTS |
| Pongo abelii      | PQNTDADTAS | PSNGTHNNSV | LPVTASAPTS | LLPKNISV-- | -ESREEEITS |
| Sus scrofa        | PQSPPASPTS | GTPSTSVLPI | IASAPTSPPT | --KNVSV--  | -AGAEETPTS |
| Bos taurus        | PQ---SPPAS | PTSGPSNNSV | LLDPTPVPTS | LPTKNIST-- | -EPREEQSTS |
| Rattus norvegicus | AQHTAMATTP | VASATHNASV | LRTTAASLTS | ---QLPT--  | -HPREEAVTS |
| Gallus gallus     | AGLKDTQTPG | LGDDPVAPSL | APFPVVGTS  | GPGSGGTPVP | TAAPHQSTPL |
| Consistency       | 6634354766 | 4655756488 | 7446655578 | 2113455400 | 0546896588 |

|                   | 110        | 120        | 130        | 140         | 150        |
|-------------------|------------|------------|------------|-------------|------------|
| Homo sapiens      | PGSNWEGTNT | DPSPSGF--- | SSTSGGVHLT | TTLEEHSSGT  | PEAGVAATLS |
| Pan troglodytes   | PGSNWEGTNT | DSPSPGF--- | SSTSGGVHLT | TTLEEHSSGT  | PEVGMAATLS |
| Mus musculus      | PPLKRDVNST | DSSPAGF--- | PSTSSDGHLA | PTPEEHSLSGS | PEATVPATGS |
| Pongo abelii      | PGSNWEGTNT | DSPSPGF--- | SSTSGGVHLT | TTLEEHSLGT  | PEAGVAATLS |
| Sus scrofa        | PASQSAGTET | VPSSTSG--- | GLH-----LT | PTPEEHSPTV  | PEASVPATGS |
| Bos taurus        | PASNWEGTDP | SPTSGGV--- | H-----LT   | PTPEEHSST   | PEAGVPTTGS |
| Rattus norvegicus | PPLKREVNST | DSSPTGF--- | SSNSSGIHLA | PTPEEHSLSGS | PETSVPATGS |
| Gallus gallus     | TAVGPTSNV  | SPEVGDRNGS | TTAMLSRAST | LTNTVTAADS  | PSVAPSSVPP |
| Consistency       | 8555365657 | 5775474000 | 4544232387 | 5*48879457  | *865757838 |

|                   | 160        | 170        | 180        | 190        | 200        |
|-------------------|------------|------------|------------|------------|------------|
| Homo sapiens      | QSAAEPPTLI | SPQAPASSPS | SLST--SPPE | VFSASVTTNH | SSTVTSTQPT |
| Pan troglodytes   | QSTAEPTLI  | SPQAPASSPS | SLST--SPPE | VFSASVTTNH | SSTVTSTQPT |
| Mus musculus      | QSPML----L | SSQAPTSATT | SPAT--SLSE | SLSASVTSSH | NSTVANIQPT |
| Pongo abelii      | QSAAEPPTLI | SPQAPASSPS | SLST--SPPE | VFSVSVTTNH | SSTVTSTQPT |
| Sus scrofa        | QPQAESPALT | SPQAPTSSPS | PPST--SPLE | VPSASISTSN | SSTETSTKPT |
| Bos taurus        | QPPAESPTLT | SPQGPASSPL | PPST--SPPE | VPSASISTSH | SSAETSTEPT |
| Rattus norvegicus | QSPTL----L | FSQGPTSAST | SPAT--SPSE | PLSASVTSNH | SSTVNNIQPT |
| Gallus gallus     | TLETVLSPT  | AHSSVARGTT | DLGTNPSPVD | TPTSFSSSSP | HNSTLHSSPG |
| Consistency       | 8546524336 | 7586878756 | 647*00*749 | 5387877776 | 78756667*8 |

|                   | 210         | 220         | 230        | 240        | 250        |
|-------------------|-------------|-------------|------------|------------|------------|
| Homo sapiens      | GAPTAPES--S | PTEESSSDHT  | PTSHATAEPV | -PQEKTPPTT | VSGKVMCELI |
| Pan troglodytes   | GAPTAPES--S | PTEESSSDHT  | PTSHATAEPV | -PQEKTPPTT | VSGKVMCELI |
| Mus musculus      | EAPMAPASPT  | EEHSSSHTPT  | SHVTAEPVVK | -EK--SPQDT | EPGKVIC--- |
| Pongo abelii      | GAPTAPES--S | PTEESSSDHT  | PTSHATAEPV | -PQEKTPPTT | VSGKVMCELI |
| Sus scrofa        | GAPTTPKSPE  | EEHSSGQTPT  | SHATATPMP  | -ET--TSQAA | VPPKGTPLMI |
| Bos taurus        | GAPTTPEESHT | EEHSSSTLTPT | SHASSESPT  | -EA--TPQAT | VPPKVTCILI |
| Rattus norvegicus | GAPMAPA---  | SPTEEHSSSH  | TPTSHVTEPV | -PKEKSPQDT | EPGKVIC--- |
| Gallus gallus     | TALLSPAIP   | QPPGLTKDVP  | SPGTLAVAPS | LAMEPTSPSV | TAASPTKGM  |
| Consistency       | 6*767*5114  | 5446654536  | 54555544*5 | 0543287657 | 5558655144 |

|                   | 260        | 270         | 280        | 290        | 300        |
|-------------------|------------|-------------|------------|------------|------------|
| Homo sapiens      | DMETTTTFPR | VIMQVEVEHAL | SSGSIAAITV | TVIAVLLVF  | GVAAYLKIRH |
| Pan troglodytes   | DMETTTTFPR | VIMQVEVEHAL | SSGSIAAITV | TVIAVLLVF  | GVAAYLKIRH |
| Mus musculus      | --ESETTTTF | LIMQVEVENAL | SSGSIAAITV | TVIAVLLVF  | GGAAYLKIRH |
| Pongo abelii      | DMETTTTFPR | VIMQVEVEHAL | SSGSIAAITV | TVIAVLLVF  | GVAAYLKIRH |
| Sus scrofa        | DTETTAASPR | VIMQVEVEHAL | SSGSIAAITV | TVIAVLLVF  | GVAAYLKIRH |
| Bos taurus        | DMETTTTSPG | VIMQVEVEHAL | SSGSIAAITV | TVIAVLLVF  | GVAAYLKIRH |
| Rattus norvegicus | --ESETTTTF | LIMQVEVENAL | SSGSIAAITV | TVIAVLLVF  | GAAAYLKIRH |
| Gallus gallus     | EEGKSTPSTG | VTIEEVPHAL  | SAGSIVAITV | TVIVVLLVF  | GAAAYLKIRH |
| Consistency       | 4386687483 | 8889**87**  | *9***8***  | ***8**9*** | *6*****    |

|                   | 310       | 320         |
|-------------------|-----------|-------------|
| Homo sapiens      | SSYGRLDDH | DY--GSWGNYN |
| Pan troglodytes   | SSYGRLDDH | DY--GSWGNYN |
| Mus musculus      | SSYGRLDDH | DY--GSWGNYN |
| Pongo abelii      | SSYGRLDDH | DY--GSWGNYN |
| Sus scrofa        | SSYGRLDDH | DY--GSWGNYN |
| Bos taurus        | SSYGRLDDH | DY--GSWGNYN |
| Rattus norvegicus | SSYGRLDDH | DYGSWGNYN   |
| Gallus gallus     | SSYGRLDDH | DY--GSWGNYN |
| Consistency       | *****     | **00*****   |
